## False-negative Results of Human Immunodeficiency Virus (HIV) Rapid Testing in HIV Controllers

Mehdi Hage-Sleiman,<sup>1</sup> Pauline Tremeaux,<sup>2,3,4,10</sup> Marine Fillion,<sup>2,3,4</sup> Farouly Boufassa,<sup>5</sup> Adeline Melard,<sup>2,3,4</sup> Elise Gardienet,<sup>2,3,4</sup> Alice-Andrée Mariaggi,<sup>2,3,4,10</sup> Jean-Christophe Plantier,<sup>6</sup> Christine Rouzioux,<sup>2</sup> Olivier Lambotte,<sup>7,8,9</sup> and Véronique Avettand-Fenoel<sup>1,2,3,4,9</sup>; for the CODEX ANRS Cohort Study Group

<sup>1</sup>AP-HP, Laboratoire de Microbiologie Clinique, Hôpital Necker-Enfants Malades, <sup>2</sup>Université Paris Descartes, Sorbonne Paris Cité, Faculté de Médecine, <sup>3</sup>INSERM, U1016, Institut Cochin, and <sup>4</sup>CNRS, UMR8104, and Paris, France; <sup>5</sup>CESP, INSERM U1018, Université Paris Sud, UVSQ, Université Paris-Saclay, Le Kremlin Bicêtre, France; <sup>6</sup>Laboratoire de Virologie, Hôpital Charles Nicolle, CHU de Rouen, and GRAM, Equipe d'Accueil 2656, Faculté de Médecine-Pharmacie, Institut de Recherche et d'Innovation en Biomédecine, Université de Rouen, Rouen, France; <sup>7</sup>INSERM UMR 1184, Immunologie des Maladies Virales et Autoimmunes (IMVA), Université Paris Sud, Le Kremlin Bicêtre, CEA, DSV/iMETI, Division of Immuno-Virology, IDMIT, Fontenay aux Roses, France; <sup>8</sup>AP-HP, CHU Bicêtre, Service de Médecine Interne et Immunologie Clinique; <sup>9</sup>Université Paris Sud, UMR 1184, F 94276, Le Kremlin-Bicêtre, France; <sup>10</sup>AP-HP, Laboratoire de Virologie, Hôpital Cochin, Paris, France

Serological assays were performed on 85 human immunodeficiency virus-controller samples. 6% presented a negative rapid screening test 7% presented an indeterminate Western blot. The enzyme immunoassay ratio decreased in controllers who had continual negative ultrasensitive HIV RNA results since inclusion.

**Keywords.** HIV controllers; HIV diagnosis; ELISA; HIV-1 Western blot; HIV rapid screening test.

Human immunodeficiency virus type 1 (HIV-1) controllers (HICs) are a rare group of individuals living with HIV who maintain HIV viremia at extremely low or even undetectable levels in the absence of antiretroviral treatment (ART) [1]. In this context, some cases of downregulation of the antibody response to HIV infection have been described [2–5].

It is well described that false-negative and weakly reactive HIV fourth-generation assay and rapid screening test (RST) results can occur in another context of viremia control, in long-term virally suppressed individuals receiving ART [6, 7]. RSTs are increasingly being used, including by patients themselves in settings “outside of the laboratory.”

Taking such issues into account, this study was designed to evaluate the risk of false-negative results contributing to HIV misdiagnoses in the HIC group. We investigated anti-HIV

humoral antibody detection and its evolution in a group of HICs who had a particularly efficient control of the infection for a long period of time (all HIV RNA plasma loads <100 copies/mL except at time of diagnosis).

### METHODS

The French multicenter Agence Nationale de Recherches sur le SIDA et les hépatites virales CO21 Cohorte des Extrêmes (ANRS CO21 CODEX) cohort included 220 HICs based on the following characteristics: an individual living with HIV who never received ART, with a follow-up time longer than 5 years, and with the last 5 HIV RNA plasma measurements <400 copies/mL. All HICs from this cohort who presented HIV RNA plasma loads <100 copies/mL at each point of their monitoring (except at the time of diagnosis) were selected for the study. All participants gave written informed consent. The Regional Investigational Review Board (Comité de Protection des Personnes Ile-de-France VII, Paris, France) approved the study protocol, which was performed in compliance with the tenets of the Declaration of Helsinki.

A highly sensitive and specific HIV RST (INSTI bioLytical/Nephrotek, Boulogne-Billancourt, France) [8], 2 fourth-generation HIV enzyme immunoassays (EIAs; VIDAS HIV DUO ULTRA, bioMérieux, Marcy l’Etoile, France, and ARCHITECT HIV Ag/Ab Combo, Abbott, Abbott Park, IL), and an HIV-1 Western blot (WB) confirmation assay (BioRad, Marnes la Coquette, France) were performed on the first frozen plasma sample available since inclusion in the cohort and, if sufficient plasma was available, on the last sample collected in the cohort with an undetectable viral load. The HIV antibody specificity against 10 HIV-1 antigens (gp160, gp110/120, p68/66, p55, p52/51, gp41, p40, p34, p24, and p18/17) was scored by WB analysis. WBs were considered positive when at least 2 positive antibody reactions to *env* proteins and 1 to *gag* or *pol* proteins occurred. Otherwise, the profile was considered indeterminate (presence of some antibodies without meeting the criteria for positivity) or negative.

HIV RNA was quantified in a large volume of frozen plasma every 12 months by ultrasensitive quantitative reverse-transcription polymerase chain reaction (qRT-PCR) as previously described [5, 9]. The threshold ranged from 1 to 40 copies/mL, depending on the available plasma volume (0.5 to 15 mL); more than 90% of quantifications were performed with a threshold of <5 copies/mL. HIV DNA was quantified in frozen peripheral blood mononuclear cells (PBMCs) by ultrasensitive PCR (Biocentric, France) [9, 10]. More than 90% of quantifications were performed with a threshold of <20 copies/million PBMCs.

Received 26 May 2019; editorial decision 24 July 2019; accepted 31 July 2019; published online September 21, 2019.

Correspondence: V. Avettand-Fenoel, Laboratoire de Microbiologie clinique, 149 rue de Sèvres, 75015 Paris, France (veronique.avettand@aphp.fr).

Clinical Infectious Diseases® 2020;70(8):1754–7

© The Author(s) 2019. Published by Oxford University Press for the Infectious Diseases Society of America. All rights reserved. For permissions, e-mail: journals.permissions@oup.com. DOI: 10.1093/cid/ciz734

The results are reported as median levels with interquartile ranges (IQRs). GraphPad Prism software (San Diego, CA) was used for the statistical analyses (Wilcoxon test).

## RESULTS

Eighty-five HICs (39%) with all HIV RNA <100 copies/mL except during the diagnosis were selected from the ongoing ANRS CODEX cohort enrolled from 2009 to 2017. The characteristics of the study population are provided in Table 1. The median and range of the number of ultrasensitive HIV RNA tests performed during the observation period were 5 (range, 1–9; IQR, 4–7). Only 1 HIC had HIV RNA consistently <100 copies/mL but never undetectable, with the highest HIV RNA at 33 copies/mL. Globally, during follow-up with the ultrasensitive assay, 9 HICs among the 85 had had at least 1 positive HIV RNA load. These viral loads were then positive in 1/9 to 3/5 samples.

The RST was negative in 3/85 cases (4%; Supplementary Table 1), while samples from 21 cases (25%) were weakly reactive with a very faint band. HIV-1 EIA tests were positive in the first serum sample of all tested participants with results that were sometimes near the positivity cutoff threshold (85/85 for the bioMérieux assay with values ranging from 6.89 to 24.74 arbitrary units (positive when >0.25), 82/82 for the Abbott assay with signal-to-cutoff (S/CO) ratios between 4.72 and 1044.08 (positive when S/CO ratios were >1). WBs presented 3 HIV-1 bands (anti-gp160, anti-p55, and anti-p24 antibodies) in 3/85 cases (3.5%), 6 bands in 4/85 (4.7%), 7 bands in 3/85 (3.5%), 8 bands in 3/85 (3.5%), 9 bands in 4/85 (4.7%), and 10 bands in 68/85 (80.1%). Overall, WBs were positive in 80/85 (94%) cases and indeterminate in 5/85 (6%) cases (Supplementary Table 1). For these 5 cases, the RST was negative for 3 and weakly positive for 1. Interestingly, HICs with indeterminate WBs and/or false-negative RSTs in the cohort had at least 1 positive HIV DNA test during the follow-up in the cohort, most often <10 copies/million PBMCs, which could help to confirm the HIV diagnosis.

To investigate a possible decline in HIV antibodies associated with HIV control, we examined the variation over time for 65 HICs who had available plasma at a second collection time point with a median follow-up of 3.2 years since inclusion in the cohort (IQR, 2.0;4.7). The evolution of the RST results, EIA ratio, and anti-HIV band numbers was analyzed. RST results were stably positive for 61/64 HICs tested; 2 HICs with all ultrasensitive viral loads that were undetectable from inclusion presented with RST seroreversion (6 and 1 years between the 2 samples); and 1 patient presented with RST seroconversion (2 years between the 2 samples; Supplementary Table 1). The EIAs remained positive for all HICs (n = 65). Interestingly, HICs with HIV RNA undetectable by the ultrasensitive assay since inclusion in the cohort had a significant decrease in the EIA ratio (median, –0.1) over time ( $P = .01$ ), indicating a decrease in HIV antibody titer, whereas those who had at least

1 positive result (HIV RNA range, 21–557 copies/mL) had no change in the ratio ( $P = .78$ ).

While 92% of HICs (60/65) had no change in the WB pattern, 3 participants lost HIV-1 antibodies: 1 participant lost 4 antibodies, and the WB became indeterminate; 1 participant lost 2 antibodies; and 1 participant lost 1 antibody without a change in the interpretation of the assay. Two participants had 1 additional detectable antibody.

Combining the results of 2 points of analysis, 5/85 (6%) HICs had a negative RST and 6/85 (7%) had an indeterminate WB in at least 1 of the analyzed samples (Supplementary Table 1). Among these HICs with “indeterminate WB” samples, all had a negative HIV viral load during the follow-up since their inclusion in the cohort, and 4 also had a negative RST.

## DISCUSSION

Our objective was to determine whether some HICs with robust viral control of HIV could present false-negative HIV diagnosis assay results due to a low antibody response during

**Table 1. Main Characteristics of the 85 Human Immunodeficiency Virus Controllers**

| Characteristic                                                                  | Value                |
|---------------------------------------------------------------------------------|----------------------|
| Men, n (%)                                                                      | 31 (36)              |
| Age at inclusion in the cohort, median (IQR), y                                 | 52 (46–57)           |
| Transmission                                                                    |                      |
| Blood, n (%)                                                                    | 1 (1)                |
| Sex, n (%)                                                                      | 57 (67)              |
| Intravenous drug use, n (%)                                                     | 18 (21)              |
| Other, n (%)                                                                    | 9 (11)               |
| HLA B27/57 alleles, n (%)                                                       | 33 (39)              |
| HIV RNA VL at inclusion, median (IQR), log copies/mL                            | Und. (und.–und.)     |
| Percentage of detectable ultrasensitive HIV RNA VL since enrollment (IQR)       | 0 (0–100)<br>(0–0)   |
| HIV DNA at inclusion, median (IQR), log copies/million PBMCs                    | 1.30 (1.0–1.64)      |
| HIV DNA at last point, median (IQR), log copies/million PBMCs                   | 1.07 (0.6–1.38)      |
| CD4 <sup>+</sup> T-cell count at inclusion, median (IQR), cells/mm <sup>3</sup> | 775 (619–989)        |
| CD4 <sup>+</sup> /CD8 <sup>+</sup> ratio at inclusion, median (IQR)             | 1.35 (0.94–1.86)     |
| EIA bioMérieux antibodies, median (range), arbitrary units <sup>a</sup>         |                      |
| First measurement available (n = 85)                                            | 22.05 (6.89–24.74)   |
| Second measurement available (n = 65)                                           | 21.95 (8.96–24.74)   |
| EIA Abbott antibodies ratio, <sup>b</sup> median (range)                        |                      |
| First measurement available (n = 82)                                            | 443.8 (4.72–1044.08) |
| Second measurement available (n = 60)                                           | 487.5 (5.95–1106.64) |
| WB number of HIV-specific antibodies                                            |                      |
| First WB, median (range) (n = 85)                                               | 10 (3–10)            |
| Second WB, median (range) (n = 65)                                              | 10 (3–10)            |

Abbreviations: EIA, enzyme immunoassay; HIV, human immunodeficiency virus; HLA, human leukocyte antigen; IQR, interquartile range; PBMCs, peripheral blood mononuclear cells; und., undetectable; VL, viral load; WB, Western blot.

<sup>a</sup>Positive when >0.25.

<sup>b</sup>Positive when the signal-to-cutoff ratio is >1.

infection. The negativity of RSTs and indeterminate or negative profiles of WB have even been described in isolated cases of elite controllers in cohorts of people living with HIV among whom the majority were progressors [11–13]. For the first time, this large study dedicated to HICs included a large number of well-characterized participants and showed that most HICs maintained an HIV-specific antibody response sufficient for HIV diagnosis. Nevertheless, in the context of the increasing use of rapid tests in settings outside of the laboratory, HIV diagnosis may be missed in 6% of HICs, and the low antibody response makes results difficult to interpret in 25% of cases (low reactivity that could easily be missed in a nonlaboratory testing environment). WB analysis could not confirm HIV seropositivity in 7% of cases. HICs with very tightly controlled HIV replication had a decrease in these HIV-specific antibody responses over time. This decrease observed for the first time in some HICs is consistent with recent studies showing HIV antibody reactivity loss in adults living with HIV [6], children and adolescents on long-term suppressive ART [14], and in the Berlin Patient [15], whose common characteristic is the absence of HIV antigenic stimulation. We recently described that some HICs have a decrease of HIV DNA over time, reflecting a particularly high control of viral replication [9]. The decrease of HIV-specific immune responses observed in this study is in accordance with this strong HIV control.

In conclusion, our results show that the RST may not be reliable in the context of natural control and very low immune stimulation over a period of several years. HIV diagnosis in HICs can be difficult, and quantification of HIV DNA with ultrasensitive assays is sometimes needed to definitively confirm infection.

### Supplementary Data

Supplementary materials are available at *Clinical Infectious Diseases* online. Consisting of data provided by the authors to benefit the reader, the posted materials are not copyedited and are the sole responsibility of the authors, so questions or comments should be addressed to the corresponding author.

### Notes

**Acknowledgments.** The authors thank the HIV-1 controllers who participated in the CODEX cohort.

**Disclaimer.** The funders of the study had no role in the study design, data collection, data analysis, data interpretation, writing of the report, or decision to submit for publication.

**Financial support.** The ANRS CODEX cohort is sponsored by the ANRS (French National Agency for Research on AIDS and Viral Hepatitis). This work was supported by the ANRS.

**Potential conflicts of interest.** The institution of M. F., A. M., E. G., and V. A. F. received grants from ANRS to support this study. O. L. received personal fees from BMS France, MSD, AstraZeneca, Genzyme, Janssen, and Incyte and grants from Gilead outside the submitted work. V. A. F. received personal fees from ViiV and support for participation in educational programs and conferences from ViiV and Janssen outside the submitted work. All other authors report no potential conflicts. All authors have submitted the ICMJE Form for Disclosure of Potential Conflicts of Interest. Conflicts that the editors consider relevant to the content of the manuscript have been disclosed.

### References

- Lambotte O, Boufassa F, Madec Y, et al; SEROCO-HEMOCO Study Group. HIV controllers: a homogeneous group of HIV-1-infected patients with spontaneous control of viral replication. *Clin Infect Dis* **2005**; 41:1053–6.
- Mendoza D, Johnson SA, Peterson BA, et al. Comprehensive analysis of unique cases with extraordinary control over HIV replication. *Blood* **2012**; 119:4645–55.
- Burbelo PD, Bayat A, Rhodes CS, et al. HIV antibody characterization as a method to quantify reservoir size during curative interventions. *J Infect Dis* **2014**; 209:1613–7.
- Côrtes FH, Passaes CP, Bello G, et al. HIV controllers with different viral load cutoff levels have distinct virologic and immunologic profiles. *J Acquir Immune Defic Syndr* **2015**; 68:377–85.
- Canoui E, Lécuroux C, Avettand-Fenoël V, et al; and the ANRS CO21 CODEX Study Group. A subset of extreme human immunodeficiency virus (HIV) controllers is characterized by a small HIV blood reservoir and a weak T-cell activation level. *Open Forum Infect Dis* **2017**; 4:ofx064.
- Fogel JM, Piwowar-Manning E, Debevec B, et al. Brief report: impact of early antiretroviral therapy on the performance of HIV rapid tests and HIV incidence assays. *J Acquir Immune Defic Syndr* **2017**; 75:426–30.
- de Souza MS, Pinyakorn S, Akapirat S, et al; RV254/SEARCH010 Study Group. Initiation of antiretroviral therapy during acute HIV-1 infection leads to a high rate of nonreactive HIV serology. *Clin Infect Dis* **2016**; 63:555–61.
- Mourez T, Lemée V, Delbos V, et al. HIV rapid screening tests and self-tests: be aware of differences in performance and cautious of vendors. *EBioMedicine* **2018**; 37:382–91.
- Avettand-Fenoël V, Bayan T, Gardienet E, et al; CODEX ANRS Cohort Study Group. Dynamics in HIV-DNA levels over time in HIV controllers. *J Int AIDS Soc* **2019**; 22:e25221.
- Avettand-Fenoël V, Chaix ML, Blanche S, et al; French Pediatric Cohort Study ANRS-CO 01 Group. LTR real-time PCR for HIV-1 DNA quantitation in blood cells for early diagnosis in infants born to seropositive mothers treated in HAART area (ANRS CO 01). *J Med Virol* **2009**; 81:217–23.
- Chen I, Cummings V, Fogel JM, et al. Low-level viremia early in HIV infection. *J Acquir Immune Defic Syndr* **2014**; 67:405–8.
- Piwowar-Manning E, Fogel JM, Laeyendecker O, et al. Failure to identify HIV-infected individuals in a clinical trial using a single HIV rapid test for screening. *HIV Clin Trials* **2014**; 15:62–8.
- Piwowar-Manning E, Fogel JM, Richardson P, et al. Performance of the fourth-generation Bio-Rad GS HIV Combo Ag/Ab enzyme immunoassay for diagnosis of HIV infection in Southern Africa. *J Clin Virol* **2015**; 62:75–9.
- Brookmeyer R, Laeyendecker O, Donnell D, Eshleman SH. Cross-sectional HIV incidence estimation in HIV prevention research. *J Acquir Immune Defic Syndr* **2013**; 63(Suppl 2):S233–9.
- Yukl SA, Boritz E, Busch M, et al. Challenges in detecting HIV persistence during potentially curative interventions: a study of the Berlin patient. *PLoS Pathog* **2013**; 9:e1003347.

### APPENDIX

Members of the ANRS CO21 CODEX cohort study group include the following: Dr Jean-Pierre Faller, Mme Patricia Eglinger, Service des Maladies Infectieuses, CH de Belfort-Montbéliard, Belfort. Pr Pascal Roblot, M David Plainchamp, Service de Médecine Interne, CHU Poitiers-La Milétrie, Poitiers. Dr Hugues Aumaitre, Mme Martine Malet, Service des Maladies Infectieuses et Tropicales, CH de Perpignan, Perpignan. Dr Christine Rouger, Pr Gérard Rémy, Melle Kmiec Isabelle, Service des Maladies Infectieuses, CHU Reims-Hôpital Robert Debré, Reims. Dr Jean-Luc Delassus, Service de Médecine Interne, CHI Ballanger, Aulnay Sous-Bois. Dr Alain Devidas, Service d'Hématologie, CH Sud-Francilien-Hôpital Gilles de Corbeil, Corbeil-Evry. Dr Eric Froguel, Mme Sylvie Tassi, Service de Médecine Interne-Maladies Infectieuses, CH de Marne la Vallée, Jossigny. Dr Philippe Genet, Mme Juliette Gerbe, Service Hématologie-Immunologie, Centre Hospitalier Victor Dupouy, Argenteuil. Pr Olivier Patey, Mr Richier Laurent, Service des Maladies Infectieuses et Tropicales, CHI Villeneuve Saint Georges, Villeneuve Saint Georges. Dr Marie-Christine Drobacheff, Dr Aurélie Proust, Service de Dermatologie, Hôpital Saint-Jacques, Besançon. Dr Helder Gil, Service de Maladies Infectieuses et Tropicales, Besançon. Dr Laurence Gérard, Pr Eric Oksenhendler, Service d'Immuno-pathologie, Hôpital Saint Louis, Paris. Pr Frédéric Lucht, Mme Véronique Ronat, Service de Maladies Infectieuses, Hôpital Bellevue, Saint Etienne. Pr Michel Dupon, Dr Hervé Dutronc, Mme

Séverine Le Puil, Service des Maladies Infectieuses, CHU-Hôpital Pellegrin, Bordeaux. Pr Jean-Luc Schmit, Mme Nathalie Decaux, Service de Pathologies Infectieuses, CHU-Hôpital Nord, Amiens. Pr Jean-Michel Molina, Dr Caroline Lascoux, Mme Sylvie Parlier, Service de Maladies Infectieuses et Tropicales, Hôpital Saint Louis, Paris. Dr Jean-Pierre BRU, Mme Gaëlle Clavere, Service des Maladies Infectieuses, Centre Hospitalier Annecy, Annecy. Pr Olivier Lambotte, Pr Jean-François Delfraissy, Pr Cécile Goujard, Mme Katia Bourdic, Service de Médecine Interne, Hôpital de Bicêtre, Le Kremlin Bicêtre. Pr Jean-François Bergmann, Mme Maguy Parrinello, Service de Médecine Interne A, Hôpital Lariboisière, Paris. Dr Gilles Pichancourt, Service Hématologie, Hôpital Henri Duffaut, Avignon. Dr Yves Welker, Service de maladies Infectieuses, CHI de Poissy-Saint Germain en Laye, Saint Germain en Laye. Dr Alain Lafeuillade, Mme Philip Giséle, Service d'Infectiologie, CHITS Hopital Sainte Musse, Toulon. Pr Christophe Rapp, Melle Lerondel, Service des Maladies Infectieuses, Hôpital d'Instruction des Armées Bégin, Saint Mandé. Dr Pierre de Truchis, Mme Huguette Berthe, Département de Médecine Aigue Spécialisée, Hôpital Raymond Poincaré, Garches. Dr Vincent Jeantils, Mme Fatouma Mchangama, Unité de Maladies Infectieuses, Hôpital Jean Verdier, Bondy. Pr. Daniel Vittecoq, Mme Claudine Bolliot, Service des Maladies Infectieuses, Hôpital de Bicêtre, Le Kremlin Bicêtre. Dr Paul Henri Consigny, Mme Fatima Touam, Consultation de Maladies Infectieuses, Centre Médical de l'Institut Pasteur, Paris. Pr Gilles Pialoux, Mme Sophie le Nagat, Service des Maladies Infectieuses, Hôpital Tenon, Paris. Pr Olivier Bouchaud, Mme Patricia Honoré, Service de Médecine Interne et Endocrinologie, Hôpital Avicenne, Bobigny. Pr François Boué, Mme Mariem Raho-Moussa, Service de Médecine Interne, Hôpital Antoine Bécclère, Clamart. Pr Laurence Weiss, Dr Lio Collias, Service d'Immunologie Clinique, HEGP, Paris. Pr Dominique Salmon-Céron, Mme Marie-Pierre Pietri, Service de Médecine Interne et centre références Maladies Rares, Hôpital Cochin, Paris. Dr David Zucman, Pr Olivier Blétry, Mme Dominique Bornarel, Service de Médecine Interne, Hôpital Foch, Suresnes. Dr Emmanuel Mortier, Mme Zeng Feng, Service de Médecine Interne, Hôpital Louis Mourier, Colombes. Pr Jean-Daniel Lelièvre, Service d'Immunologie Clinique, Hôpital Henri Mondor, Créteil. Pr Christine Katlama, Mme Yasmine Dudoit, Service des Maladies Infectieuses, Hôpital Pitié-Salpêtrière, Paris. Dr Anne Simon, Mme Catherine Lupin, Service des Maladies Infectieuses, Hôpital Pitié-Salpêtrière, Paris. Pr Pierre-Marie Girard, Mme Michèle Pauchard, Service des Maladies Infectieuses, Hôpital Saint Antoine, Paris. Dr Sylvie Abel, Dr André Cabié, Service de Maladies Infectieuses et Tropicales, Hôpital Pierre Zobda-Quitman, Fort de France, Martinique. Dr Pascale Fialaire, Dr Jean-Marie Chennebault, M Sami Rehaïem, Service des Maladies Infectieuses et Tropicales, CHU Angers, Angers. Dr Luc de Saint Martin, Dr Perfezou, M Jean-Charles Duthe, Service de Pneumologie, CHU de Brest, Brest. Pr Philippe Morlat, Mme Sabrina Caldato, Service de Médecine Interne, CHU-Hôpital Saint André, Bordeaux. Pr Didier Neau, Mme Séverine LE Puil, Service des Maladies Infectieuses A, CHU-Hôpital Pellegrin, Bordeaux. Pr Pierre Weinbreck, Dr Claire Genet, Service des Maladies Infectieuses, CHU de Limoges, Limoges. Dr Djamila Makhlofi, Mme Florence GARNIER, Service d'Immunologie Clinique, HCL-Hôpital Edouard Herriot, Lyon. Dr Isabelle Poizot-Martin, Dr Olivia Fauche, Mme Alena Ivanova, Service Hématologie-Cisih, Hôpital Sainte Marguerite, Marseille. Pr Patrick Yeni, Dr Sophie Matheron, Mme Godard Cyndi, Service des Maladies Infectieuses, Hôpital Bichat Claude Bernard, Paris. Pr François Raffi, Mr Hervé Hüe, Service de Médecine Interne, Hôpital de l'Hôtel Dieu, Nantes. Dr Philippe Perré, Service de Médecine Interne post-Urgence, Centre Hospitalier Départemental, La Roche sur Yon. Pr Pierre Marie Roger, Mme Aline Joulie, Service des Maladies Infectieuses, CHU-Hôpital l'Archet, Nice. Pr Éric Rosenthal, Service Médecine Interne, CHU-Hôpital l'Archet, Nice. Pr Christian Michelet, Dr Faouzi Souala, Mme Maja Ratajczak, Service des Maladies Infectieuses, CHU-Hôpital

Pontchaillou, Rennes. Dr Marialuisa Partisani, Mme Patricia Fischer, HUS-Hôpital Civil, Strasbourg. Pr Louis Bernard, Mme Pascale Nau, Service des Maladies Infectieuses, CHRU-Hôpital Bretonneau, Tours. Pr Bruno Marchou, Mme Florence Balsarin, Service des Maladies Infectieuses, CHU-Hôpital Purpan, Toulouse. Pr Renaud Verdon, Mr Philippe Feret, Service des Maladies Infectieuses, CHU-Hôpital de la Côte de Nacre, Caen. Dr Christine Jacomet, Service des maladies Infectieuse, CHU Gabriel Montpied, Clermont Ferrand. Dr Lionel Piroth, Mme Sandrine Gohier, Service de Maladies Infectieuses et Tropicales, CHU-Hôpital du Bocage, Dijon. Dr Pascale Leclercq, Mme Gerberon, Service Médecin Aigue spécialisée, CHU-Hôpital Albert Michallon, Grenoble. Dr Agnès Meybeck, Dr Raphaël Biekre, Service des Maladies Infectieuses, CH-Hôpital Gustave Dron, Tourcoing. Pr Thierry May, Mme Bouillon, Service de Maladies Infectieuses et Tropicales, CHU Nancy, Nancy. Pr François Caron, Dr Yasmine Debab, M David Theron, Service de Maladies Infectieuses et Tropicales, CHU-Hôpital Charles Nicolle, Rouen. Dr Patrick Miaillhes, M Stanislas Ogoudjobi, Service de Maladies Infectieuses et Tropicales, HCL-Hôpital de la Croix Rousse, Lyon. Pr Patrick Mercié, Service de Maladies Infectieuses et Tropicales, CHU-Hôpital Saint André, Bordeaux. Dr Marc Gatfosse, Service de Médecine Interne, CH René Arbelletier, Coulommiers. Dr Martin Martinot, Mme Anne Pachart, service de Maladies Infectieuses-Médecine Interne, Hôpitaux Civils de Colmar, Colmar. Dr Patrice Poubeau, Service de Pneumo-phtisiologie, Centre Hospitalier Sud Réunion-Hôpital de St Pierre, Saint Pierre, La Réunion. Dr Agnès Uludag, Service de Médecine Interne, Hôpital Beaujon, Clichy. Dr Philippe Arzac, Mme Lydia Bouaraba, Service de Médecine Interne, CHR Orléans-Hôpital Porte Madeleine, Orléans. Dr Isabelle De Lacroix Szmania, M Laurent Richier, Service de Médecine Interne, Centre Hospitalier Intercommunal, Créteil. Dr Vincent Daneluzzi, Service de Médecine A, CASH-Hôpital Max Fourestier, Nanterre. Dr Elisabeth Rouvieu, Service de Médecine Interne 2, Hôpital Ambroise Paré, Boulogne. Dr Geneviève Beck-Wirth, Service d'Hématologie Clinique VIH, Centre Hospitalier de Mulhouse, Mulhouse. Dr Philippe Romand, Service de Pneumologie, CHI Les Hôpitaux du Léman, Thonon les Bains. Dr Laurent Blum, Mme Martine Deschaud, Service Médecine-Gastroentérologie, Centre hospitalier René Dubos, Pontoise. Dr Christophe Michau, Service de Médecine Interne, Centre Hospitalier de Saint Nazaire, Saint Nazaire. Dr Christian Bernard, Mme Florence Salaun, Service de Médecine Interne, CHR Metz Thionville Hôpital Notre Dame de Bon Secours, Metz. Dr Philippe Muller, Service de Dermatologie, Hôpital Beauregard, Thionville. Dr Yves Poinçon, Service de Médecine Interne, Hôpital Prosper Chubert, CHBA, Vannes. Dr Annie Lepretre, Mme Martine Deschaud, Service de Médecine Interne, Hôpital Simone Veil, Eaubonne. Dr Thierry Lambert, Consultation d'Hématologie, CHU de Bicêtre, Le Kremlin Bicêtre. Dr Laurent Hocqueloux, Mme Barbara de Dieulevault, Service de Maladies Infectieuses et Tropicales, Hôpital Orléans la Source, Orléans. Dr Patrick Philibert, Mme Mame Penda Sow, Consultation de Médecine Interne, Hôpital Européen Marseille, Marseille. Pr Albert Sotto, Mme Doncesco, Service des Maladies Infectieuses et Tropicales, CHU Caremeau, Nîmes. Pr Jean-Paul Viard, Mme Agnès Cros, Centre de diagnostic et de thérapeutique, Hôpital Hotel Dieu, Paris. Dr Marc De Lavaissière, Service Médecine Interne, CHG de Montauban, Montauban. Dr Pascale Perfezou, M Jean Charles DUTHE, Service de Pneumologie, CH de Cornouaille-Hôpital Laennec, Quimper. Dr Catherine Gaud, Service Immunologie Clinique, Centre Hospitalier Félix Guyon, Ile de la Réunion. Dr Mathilde Aurore Niault, Mme Virginie Mouton-Rioux, Service d'hématologie, Maladies Infectieuses, CH Bretagne Sud, Lorient. Dr Jean-Philippe Talarmin, M Jean Charles Duthé, Service Médecine Interne, CH de Cornouaille-Hôpital Laennec, Quimper. Dr Dupont Mathilde, M Stéphane Natur, Service des Maladies Infectieuses et Tropicales, CH Saint Malo, Saint Malo. Dr Hikombo Hitoto, M Ali Mahamadou Ibrahim, Service de Maladies Infectieuses et Tropicales, Centre Hospitalier Le Mans, Le Mans.
